# Supplementary material for: Electrical resistivity imaging data for hydrological and soil investigations of virgin Rospuda river peatland (North-East Poland)
Source: Copernicus journal article supplement (doi:10.5194/gi-2024-11), 2024-11-04
Supplement: Supplementary file [file gi-2024-11-RC1-supplement.pdf]

**Electrical resistivity imaging data for hydrological and soil  
investigations of virgin Rospuda river peatland (North-East Poland).**

**Geoscientific Instrumentation Methods and Data Systems  
gi-2024-11**

Overall:

The paper brings results of an interesting research on the electrical resistivity imaging data, specifically for soil investigations in North-East Poland. However, there are few issues which should be clarified and improved before publishing the manuscript. Therefore, I recommend the paper for the publication after **minor revisions**.

Comments and suggestions:

1. An abstract should be less descriptive and should contain achievements of the authors and results of their research.
2. The present state review should be added/extended in the Introduction. More international publications on the topic should be mentioned and discussed. ERI techniques should be mentioned and discussed in more detail.
3. The more detailed map should be included before the cross sections are depicted. The profiles should be marked in the map. I recommend to move map and profiles to the section dealing with the site, not to be in the Introduction.
4. Fig.2 As mentioned above the more readable map should be included first (overall tiny map in the upper left corner is not enough. After that detailed map with marked profiles should be included, the profiles should follow such map e.g. as Fig. 3.
5. Fig. 2 It should be clearly explained what is depicted in the Fig. 2, meaning of colours (legend) should be included and comments and interpretation of the colours should be attached in the text.
6. L72 - "driven" instead of "hammered"?
7. Fig. 4 is hardly readable. Again it is not very clear what is depicted and how to interpret it. Please, complete.
8. Fig. 5 the scale along the axes and the legend is not readable. Please, improve.
9. L114 - How hydraulic conductivity can be derived from ERI, what is the accuracy of such estimate?
10. Conclusions are missing, please complete.
11. The literature review should be extended and related to the other scientific studies dealing with ERI.
